# Supplementary material for: Model systems for flavoenzyme activity: an electrochemically tuneable model of roseoflavinElectronic supplementary information (ESI) available: synthesis of 2, CV and spectral data. See http://www.rsc.org/suppdata/cc/b4/b401470g/
Source: Royal Society of Chemistry journal article supplement (doi:10.1039/b401470g), 2004-01-01
Supplement: b401470g.doc [file b401470g.doc]

### Electronic Supplementary Information

Model systems for flavoenzyme activity: An electrochemically tuneable model of roseoflavin

Graeme Cooke,a* Yves-Marie Legrand,a,b Vincent M. Rotellob

aCentre for Biomimetic Design & Synthesis, Chemistry, William H. Perkin Building, School of Engineering & Physical Sciences, Heriot-Watt University, Riccarton, Edinburgh, EH14 4AS, UK.

*bDepartment of Chemistry, University of Massachusetts at Amherst, Amherst, MA 01002, USA.*

**Synthesis of 2.**

Caution: Due to the air sensitivity of Ni(COD)2, the mixing of the reagents were carried out in a glove bag under

a nitrogen atmosphere.

A Schlenk tube was charged with bis(1,5-cyclooctadiene)nickel (0.09 g, 0.3 mmol, 10 mol %), 1,1’-bis(diphenylphosphino)ferrocene (0.26 mg, 0.5 mmol, 15 mol %) and sodium *tert*-butoxide (0.42 g, 4.4 mmol) under argon in a glove bag. Toluene (2 mL) was added, followed by 8-chloro-7-methyl-10-isobutylflavin6 (1 g, 3.1 mmol), 4,4’-dimethoxydiphenylamine (0.86 g, 3.8 mmol) and additional toluene (3 mL). The tube was sealed, removed from the glove bag and heated to 100 ○C with stirring for 48h. The reaction was cooled down to room temperature, diluted with toluene (15 mL) and water (3 x 20 mL). The aqueous layer was separated and the combined toluene extracts were washed with brine. The organic layer was concentrated and purified using silica gel flash chromatography (eluent: 10 % acetone in dichloromethane) to yield the pure product as purple crystals: mp 285 ○C (dec.); 1H-NMR (CDCl3, 200MHz) δ 0.79 (6H, d, 2 x CH3), 1.96 (1H, m), 1.97 (3H, s), 3.82 (6H, s, 2 x OCH3), 4.28 (2H, s), 6.76 (1H, s), 6.93 (8H, m, 8 x CH arom.), 7.95 (1H, s), 8.31 (1H, s); 13C-NMR (CDCl3, 200MHz) δ 19.88, 20.05, 27.41, 50.97, 55.56, 109.03, 115.03, 126.46, 132.52, 132.88, 133.15, 133.23, 136.08, 140.18, 151.04, 155.50, 155.84, 157.31, 160.24 ; IR (KBr, cm-1) 3140, 3095, 3014, 2961, 2816, 2361, 1706, 1650, 1520, 1505, 1432, 1244, 1030, 845, 830; MS(EI): m/z 511 (M+); acc. mass (of ion) [M+H]+ calculated C29H29N5O4: 512.2292, found: 512.2292.

## NMR titration data for 2.3 recorded in CDCl3

## Cyclic voltammetry measurements


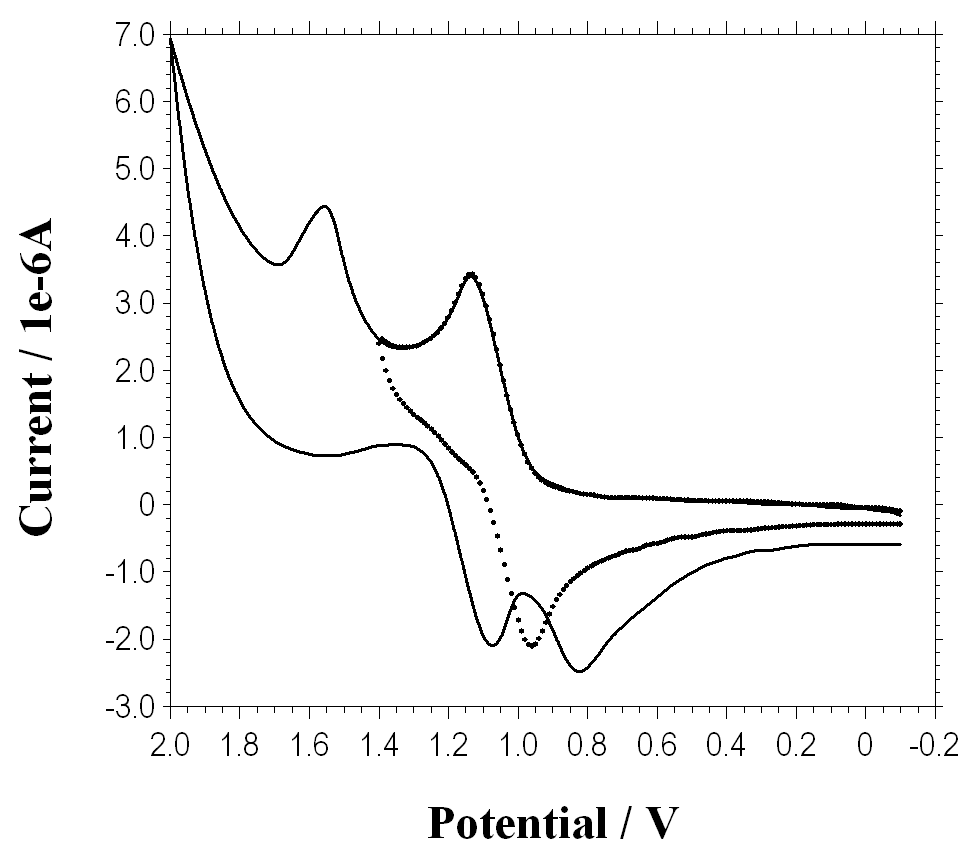


CV of **2** (4.9 x 10-4 M) recorded between: -0.1 V and +2 V (___) and -0.1 V and +1.4 V (**…..**). Reference electrode: Ag/AgCl. Scan rate = 0.1 Vs-1.


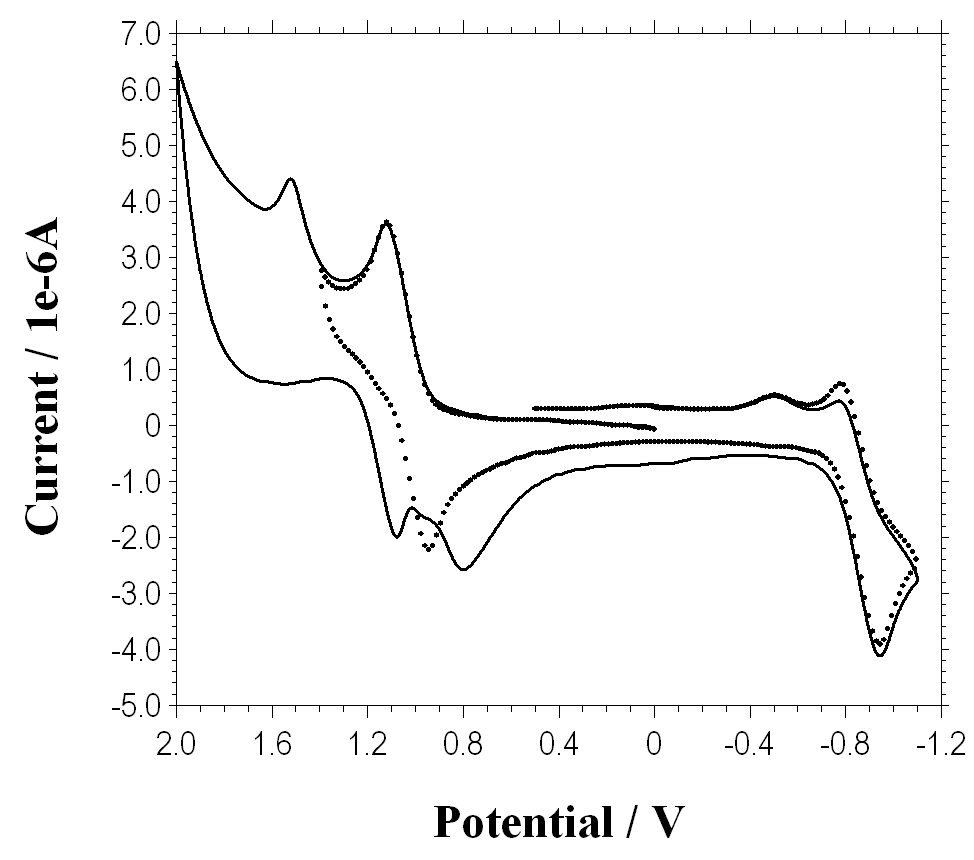


CV of **2** (4.9 x 10-4 M) recorded between: -1.1 V and +2 V (___) and -1.1 V and +1.4 V (**…..**). Reference electrode: Ag/AgCl. Scan rate = 0.1 Vs-1.


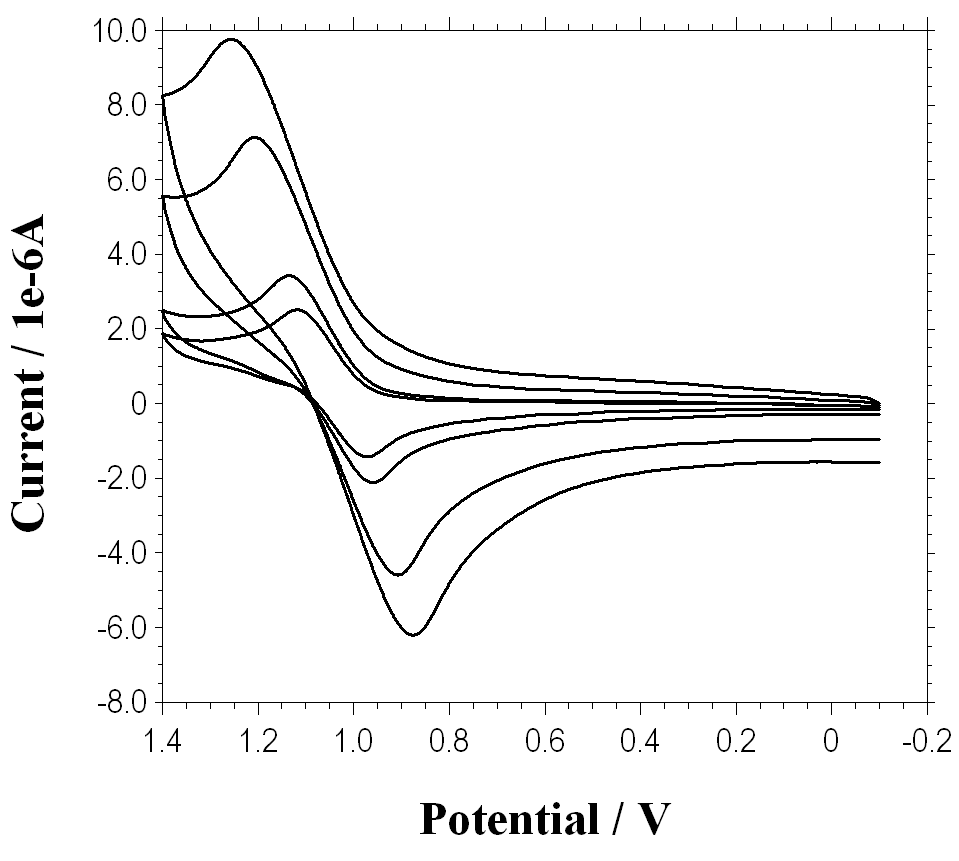


CV of **2** (4.9 x 10-4 M) recorded between -1.1 V and + 1.4 V. Reference electrode: Ag/AgCl. Scan rate = 1 Vs-1 (largest current), 0.5, 0.1 and 0.05 Vs-1(smallest current).


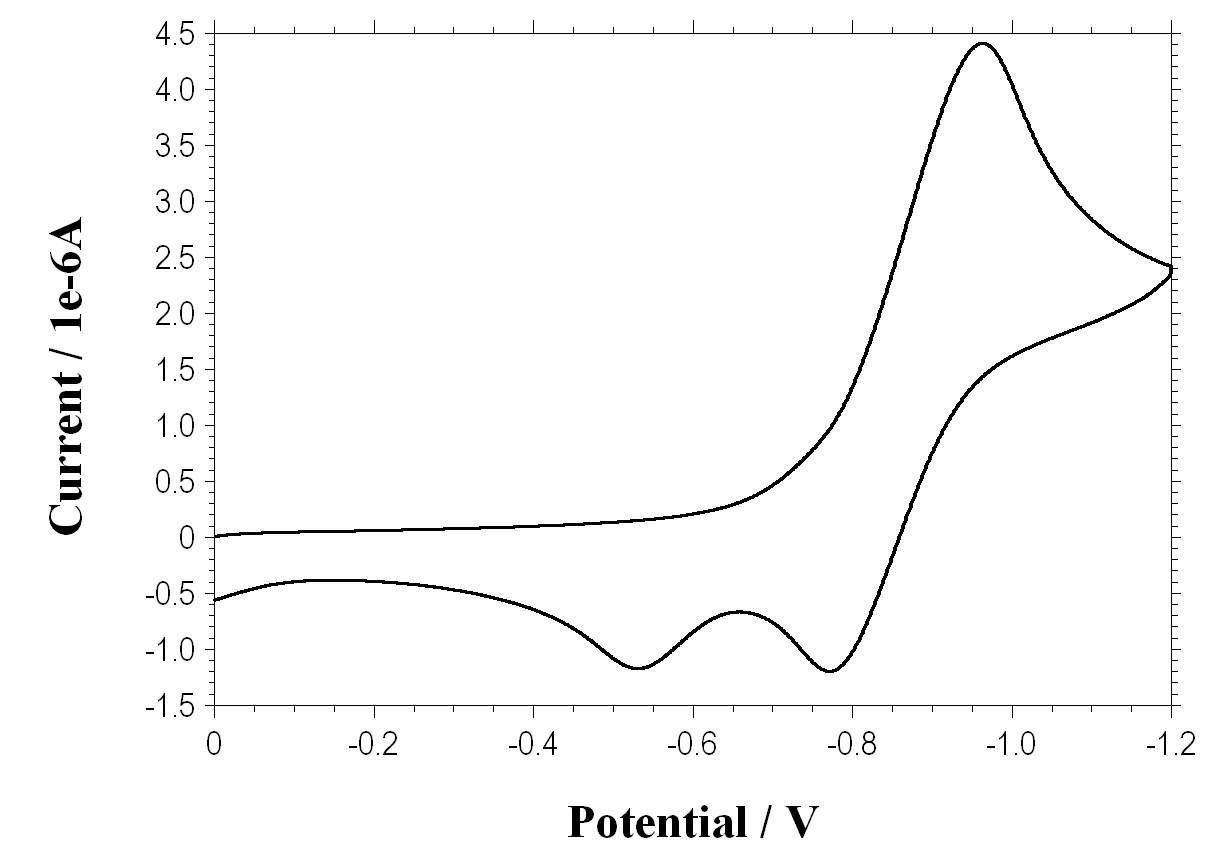


CV of **2** (6.1 x 10-4 M) recorded between 0 V and -1.2 V. Reference electrode: Ag/AgCl. Scan rate = 0.1 Vs-1


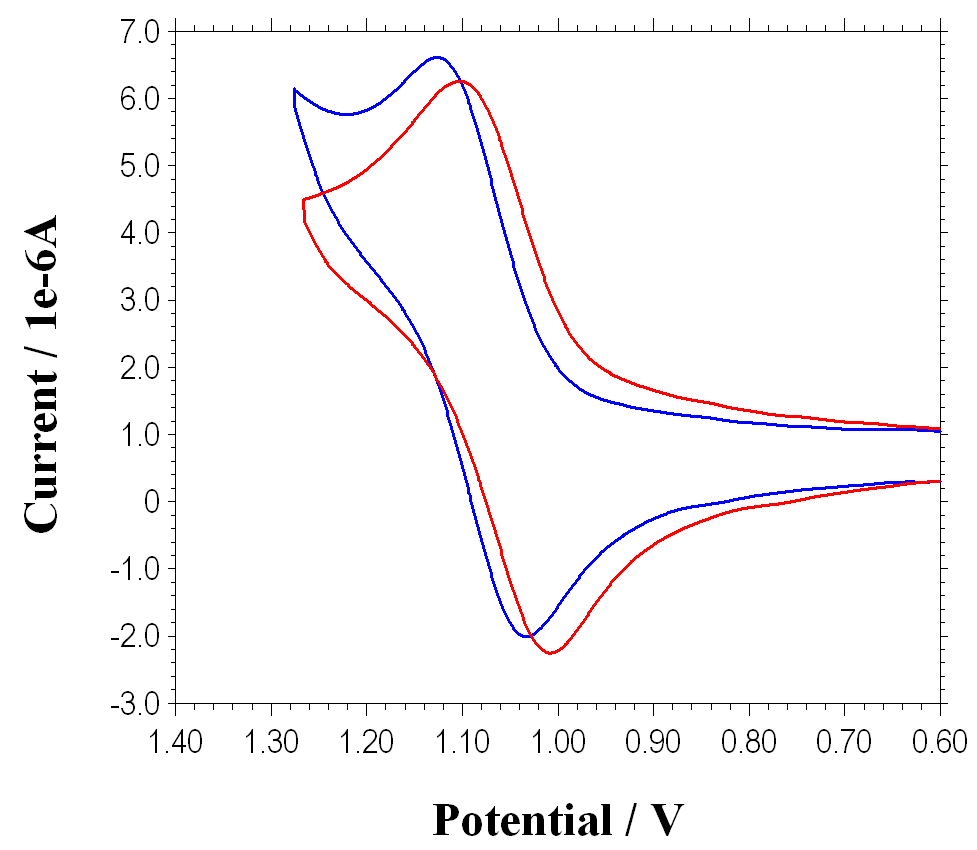


## CV of compound 2 (~7x10-4 M) (­___) and upon the addition of 30 mg of 3 (­___) (~2x10-2 M)

# UV-vis spectroelectrochemical data for 2

Selected spectroelectrochemical data for flavin **2** (~1.4x10-3M)(0 V) (**___**) and upon oxidation 1.2 V (**___**) (recorded in 0.1 M of NBu4PF6 in DCM). Measurements carried out in an OTTLE cell fitted with a Pt mesh working electrode and Pt wire counter and pseudoreference electrodes. The main cell body consisted of a Pyrex cuvette (1cm x 3cm x 0.2cm) fitted with a Teflon stopper.
